# Supplementary material
Source: PubMed Central journal article supplement (PMC7437984)
Supplement: NIHMS1534454-supplement-Supplementary_Material__updated_.pdf [file NIHMS1534454-supplement-Supplementary_Material__updated_.pdf]

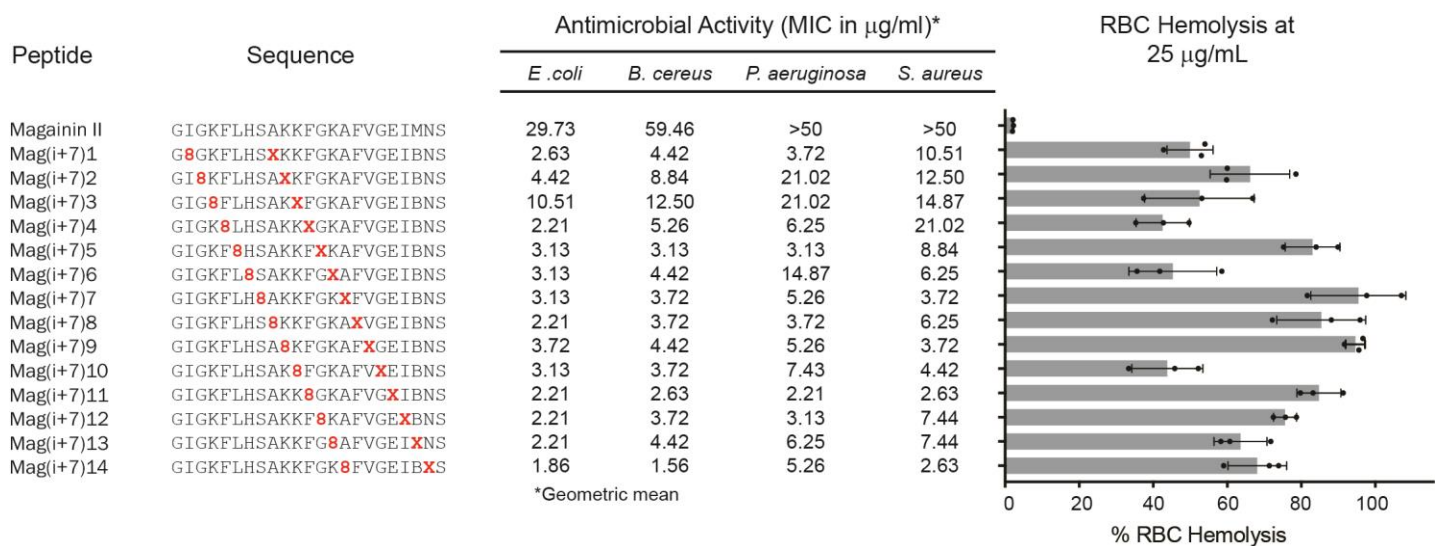

## Supplementary Figure 1

Antimicrobial and hemolytic activities of an *i*, *i*+7-stapled Mag2 library

The antimicrobial activity (MIC in  $\mu\text{g/ml}$ ) and percent RBC hemolysis at 25  $\mu\text{g/ml}$  were determined for a library of *i*, *i*+7 stapled peptides based on the Mag2 sequence. The MIC is the geometric mean of four independent experiments. Percent hemolysis data are the mean of three independent experiments (shown as dots). X, S5 stapling amino acid; 8, R8 stapling amino acid; B, norleucine (substituted for methionine to maximize the efficiency of ruthenium-catalyzed olefin metathesis).

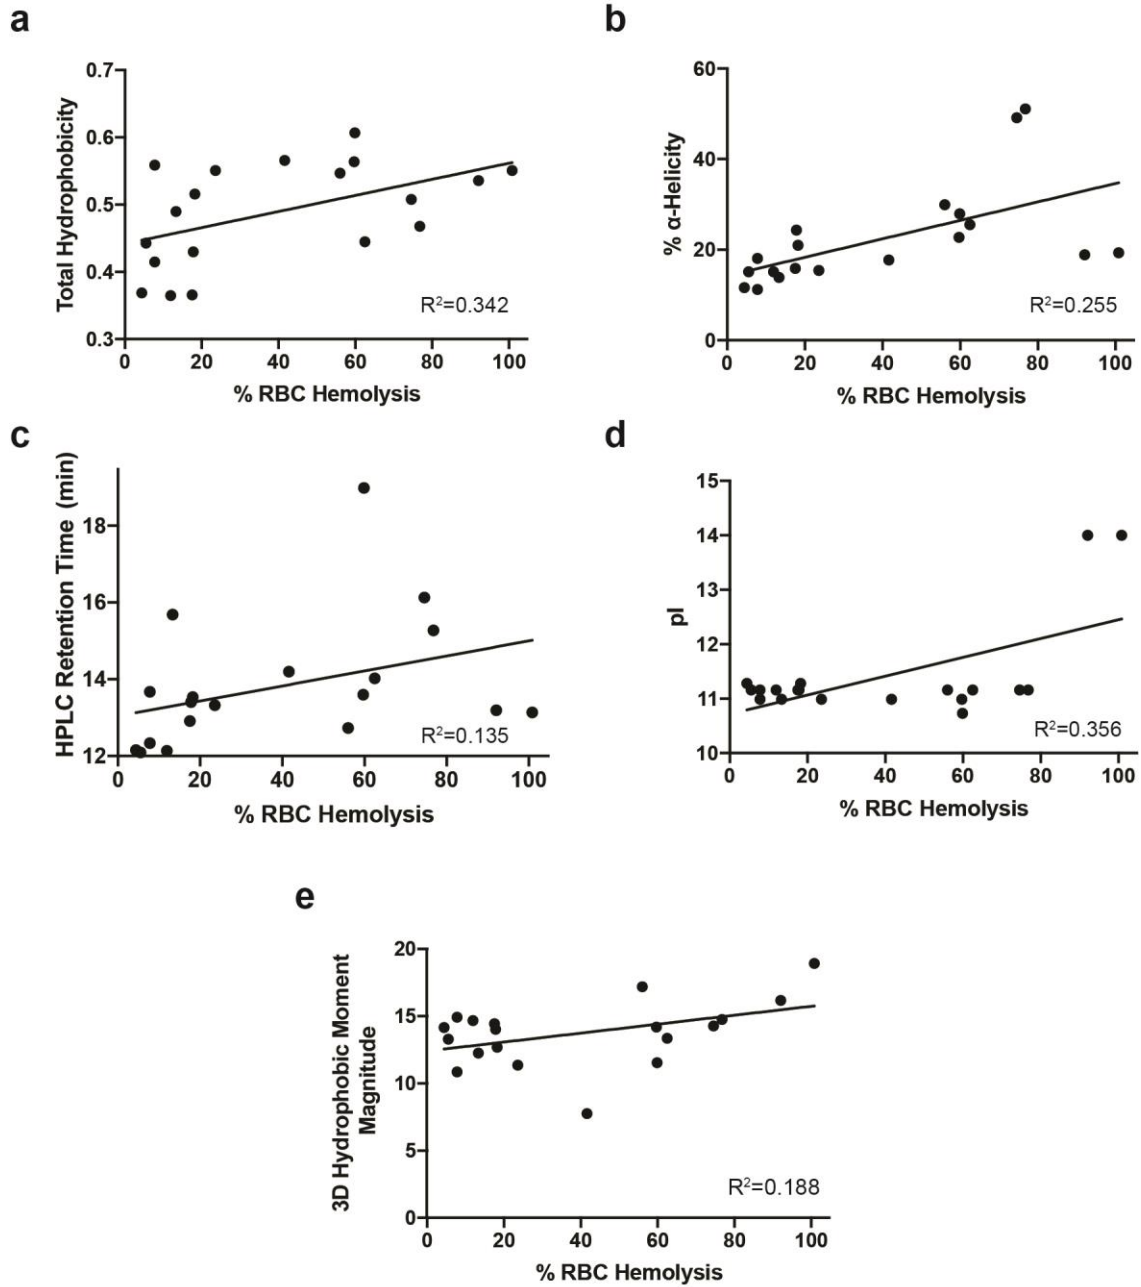

### Supplementary Figure 2

Relationships between StAMP biophysical parameters and hemolysis

**a-e**, No direct correlations were observed between percent RBC hemolysis and the total hydrophobicity (**a**), percent  $\alpha$ -helicity (**b**), HPLC retention time (**c**), pI (**d**), or 3D hydrophobic moment magnitude (**e**) of StAMPs (n=19), as calculated by Pearson correlation.

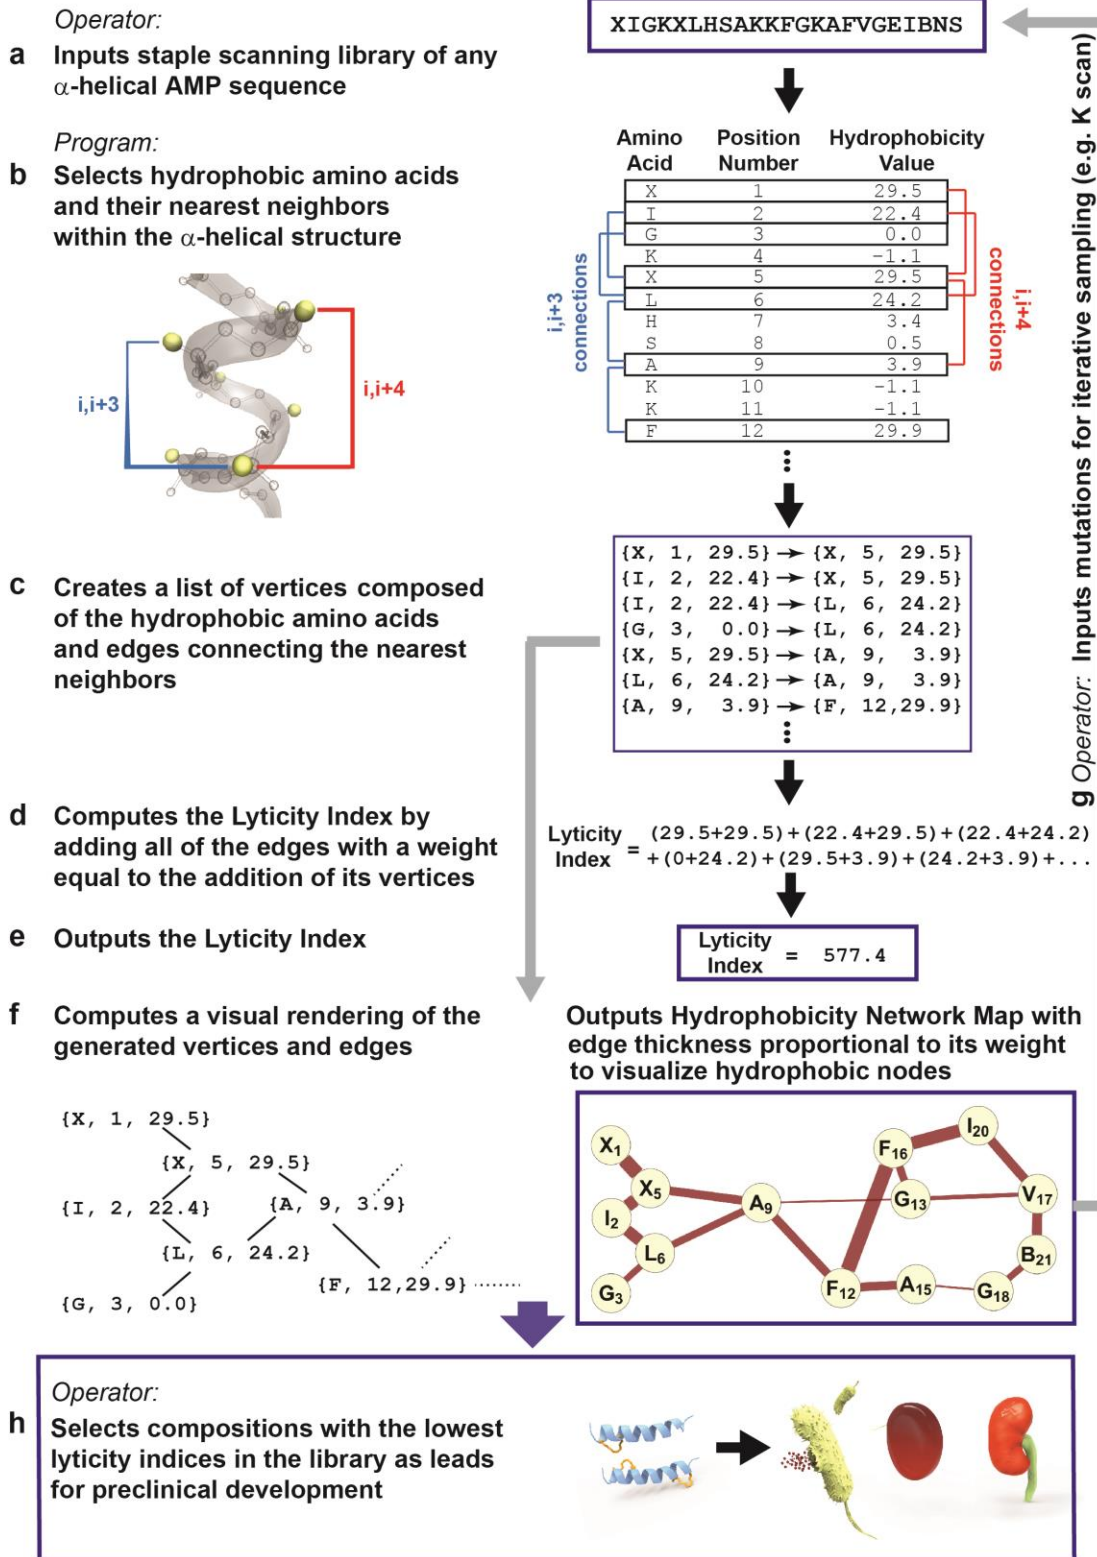

Supplementary Figure 3

A computational algorithm yields HNMs and lyticity indices for StAMPs

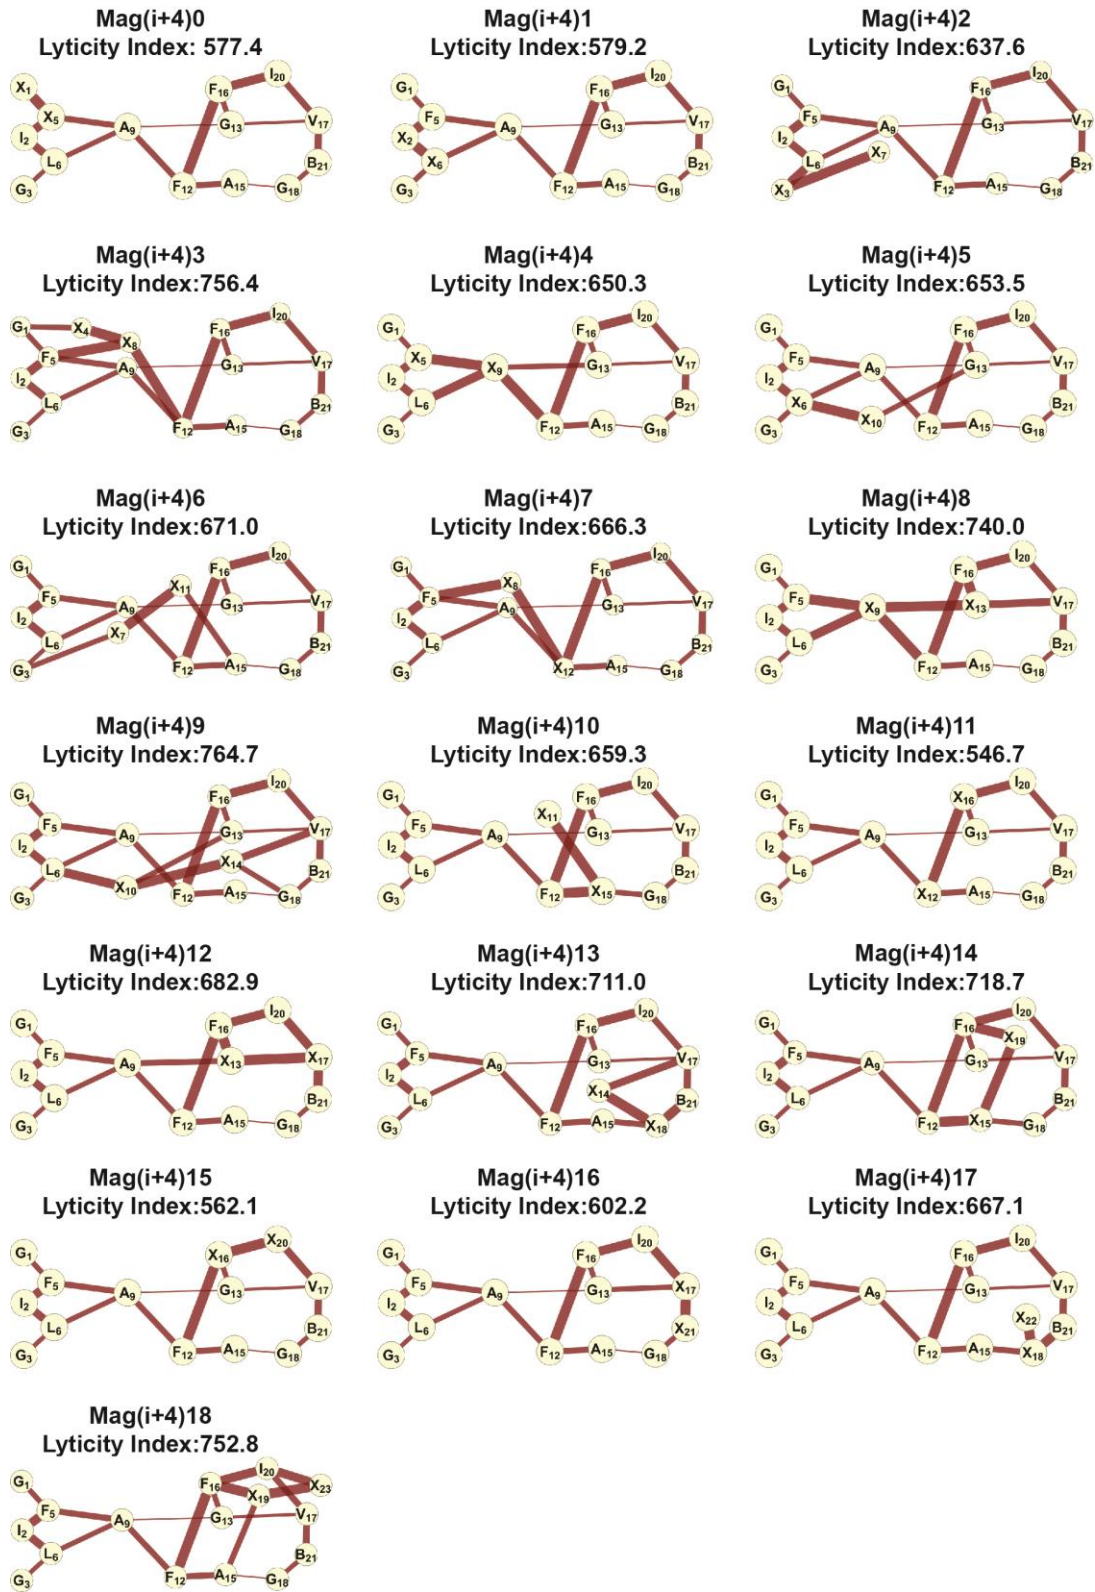

**Supplementary Figure 4**

HNMs and lyticity indices of a staple-scanning Mag(i+4) library

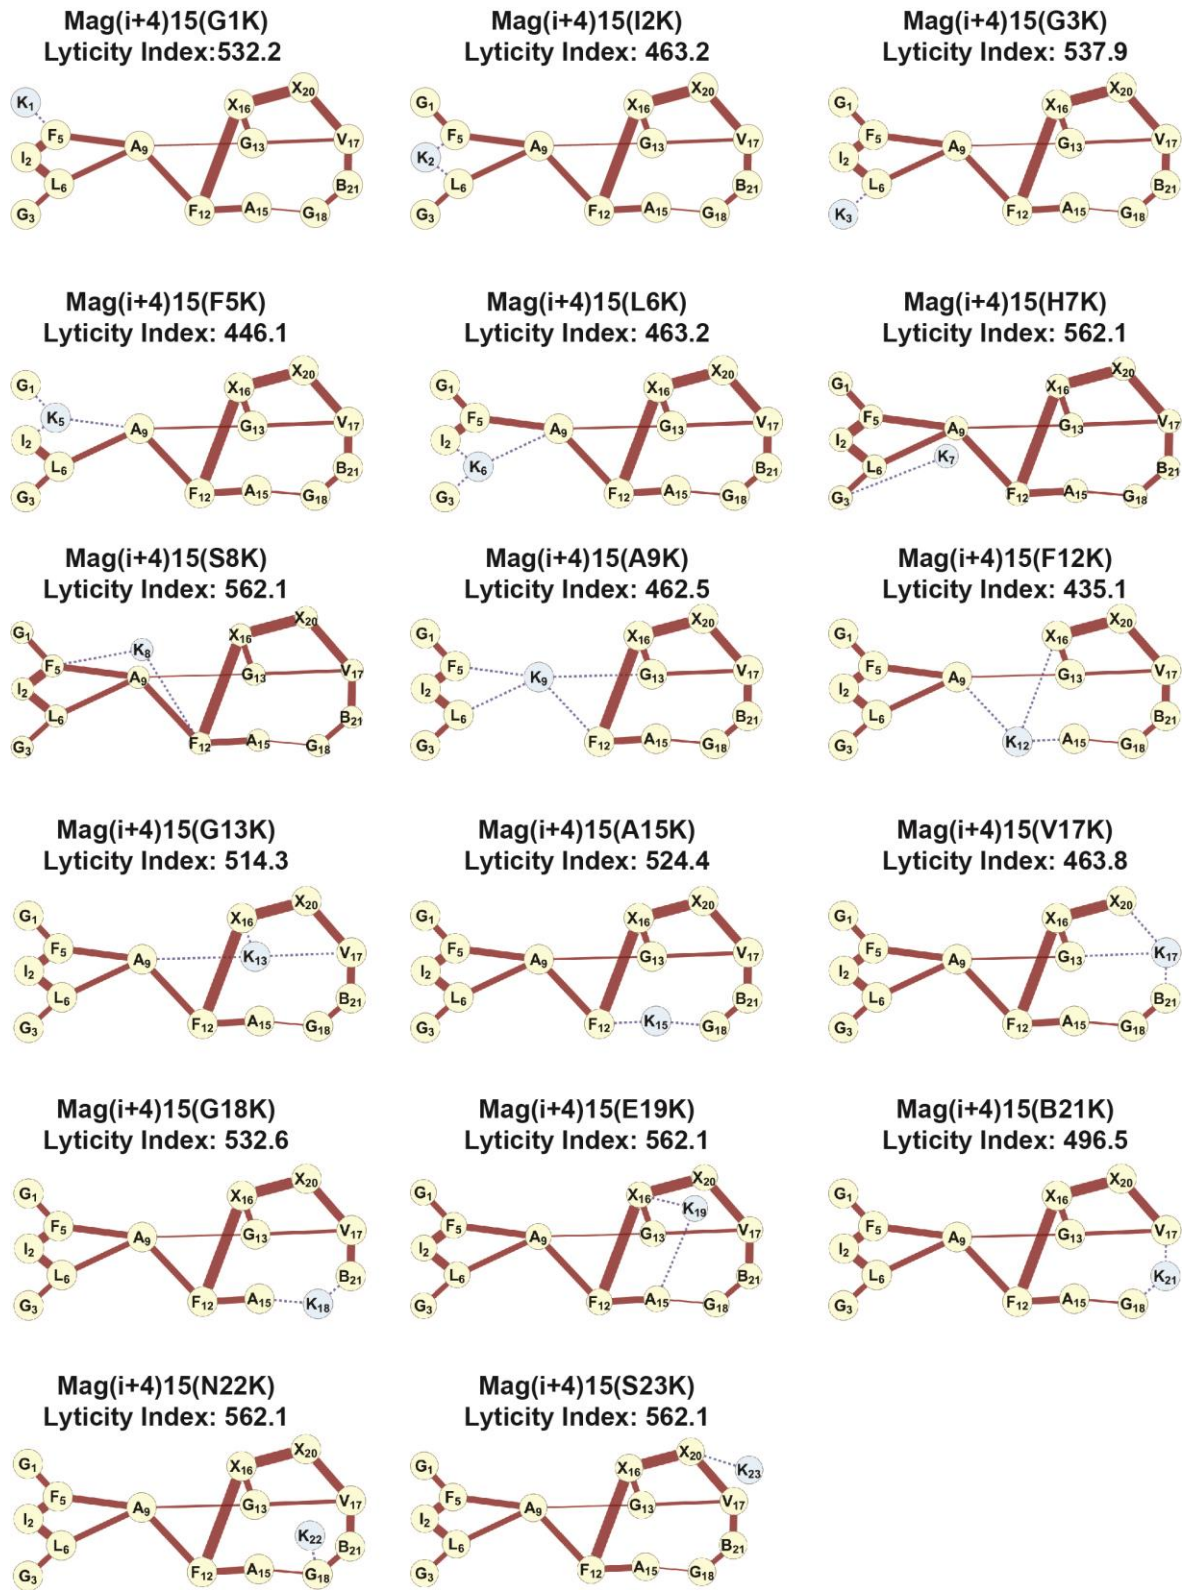

**Supplementary Figure 5**

HNMs and lyticity indices of a lysine-scanning Mag(i+4)15 library

**a**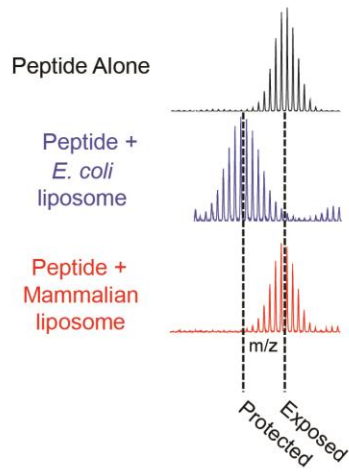**b**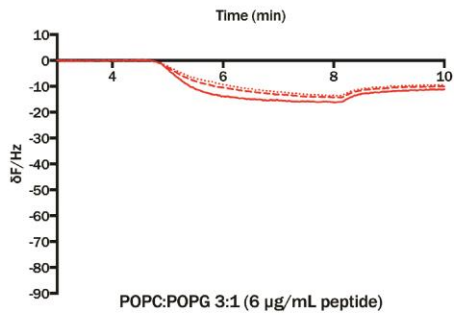**c**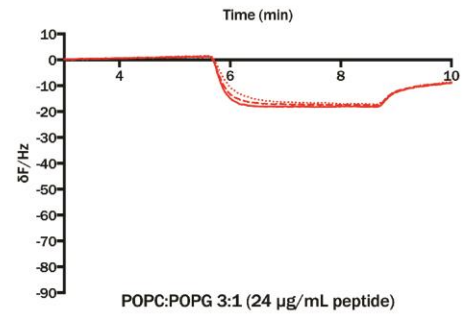**d**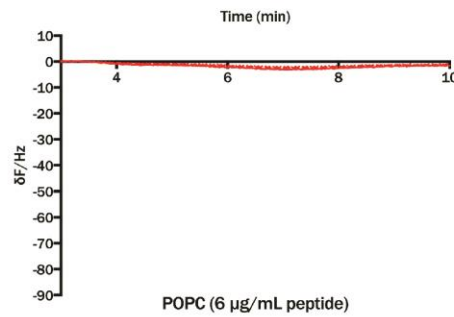**e**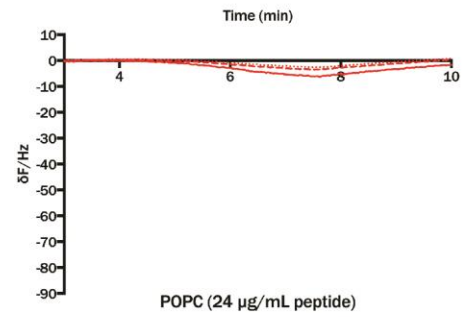

— Mag(i+4)1,15(A9K) (f3)    - - - Mag(i+4)1,15(A9K) (f7)    ···· Mag(i+4)1,15(A9K) (f11)

**f**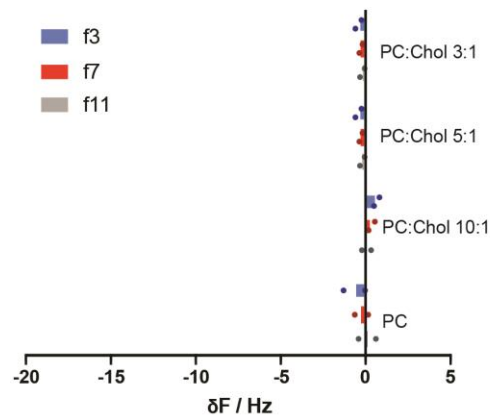

## Supplementary Figure 6

### Membrane selectivity and insertion mechanism of Mag(i+4)15(A9K)

**a**, Incubation of Mag(i+4)1,15(A9K) with anionic liposomes that mimic *E. coli* membranes (POPC:POPG) reduces deuterium exchange, whereas exposure to zwitterionic liposomes that mimic the mammalian membrane condition (POPC:Cholesterol) has no such effect and is identical to the peptide's deuterium exchange profile in aqueous solution alone. HX-MS experiments were performed independently three times with similar results. **b-e**, QCM sensorgrams demonstrate uniformity of changes in resonant frequency across harmonics for SLBs mimicking bacterial membranes (POPC:POPG) upon exposure to 6 (**b**) and 24 (**c**)  $\mu\text{g/mL}$  of Mag(i+4)1,15(A9K), consistent with transmembrane insertion. In contrast, little to no interaction is reflected in the QCM profiles of POPC mammalian-type membranes at low or high peptide dosing (**d-e**). For each condition, an exemplary sensorgram is shown for experiments performed independently two times with similar results. **f**, Accordingly, there were no changes in resonant frequency across the third (blue), seventh (red), and eleventh (black) harmonics in response to Mag(i+4)1,15(A9K) treatment (8  $\mu\text{g/mL}$ ) of SLBs composed of POPC and increasing concentrations of cholesterol. Data are mean of two independent experiments (shown as dots).

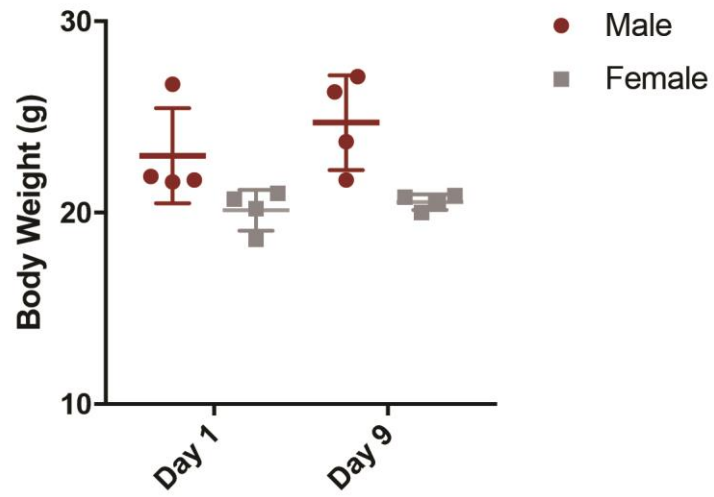

### Supplementary Figure 7

Body weights of mice treated intravenously with Mag(i+4)1,15(A9K)

Mice were treated with Mag(i+4)15(A9K) at an intravenous dose of 5 mg/kg twice daily for 8 days. Body weights were measured before (day 1) and after 8 days of treatment (day 9). Data are mean  $\pm$  s.d. for n=4 mice per sex.



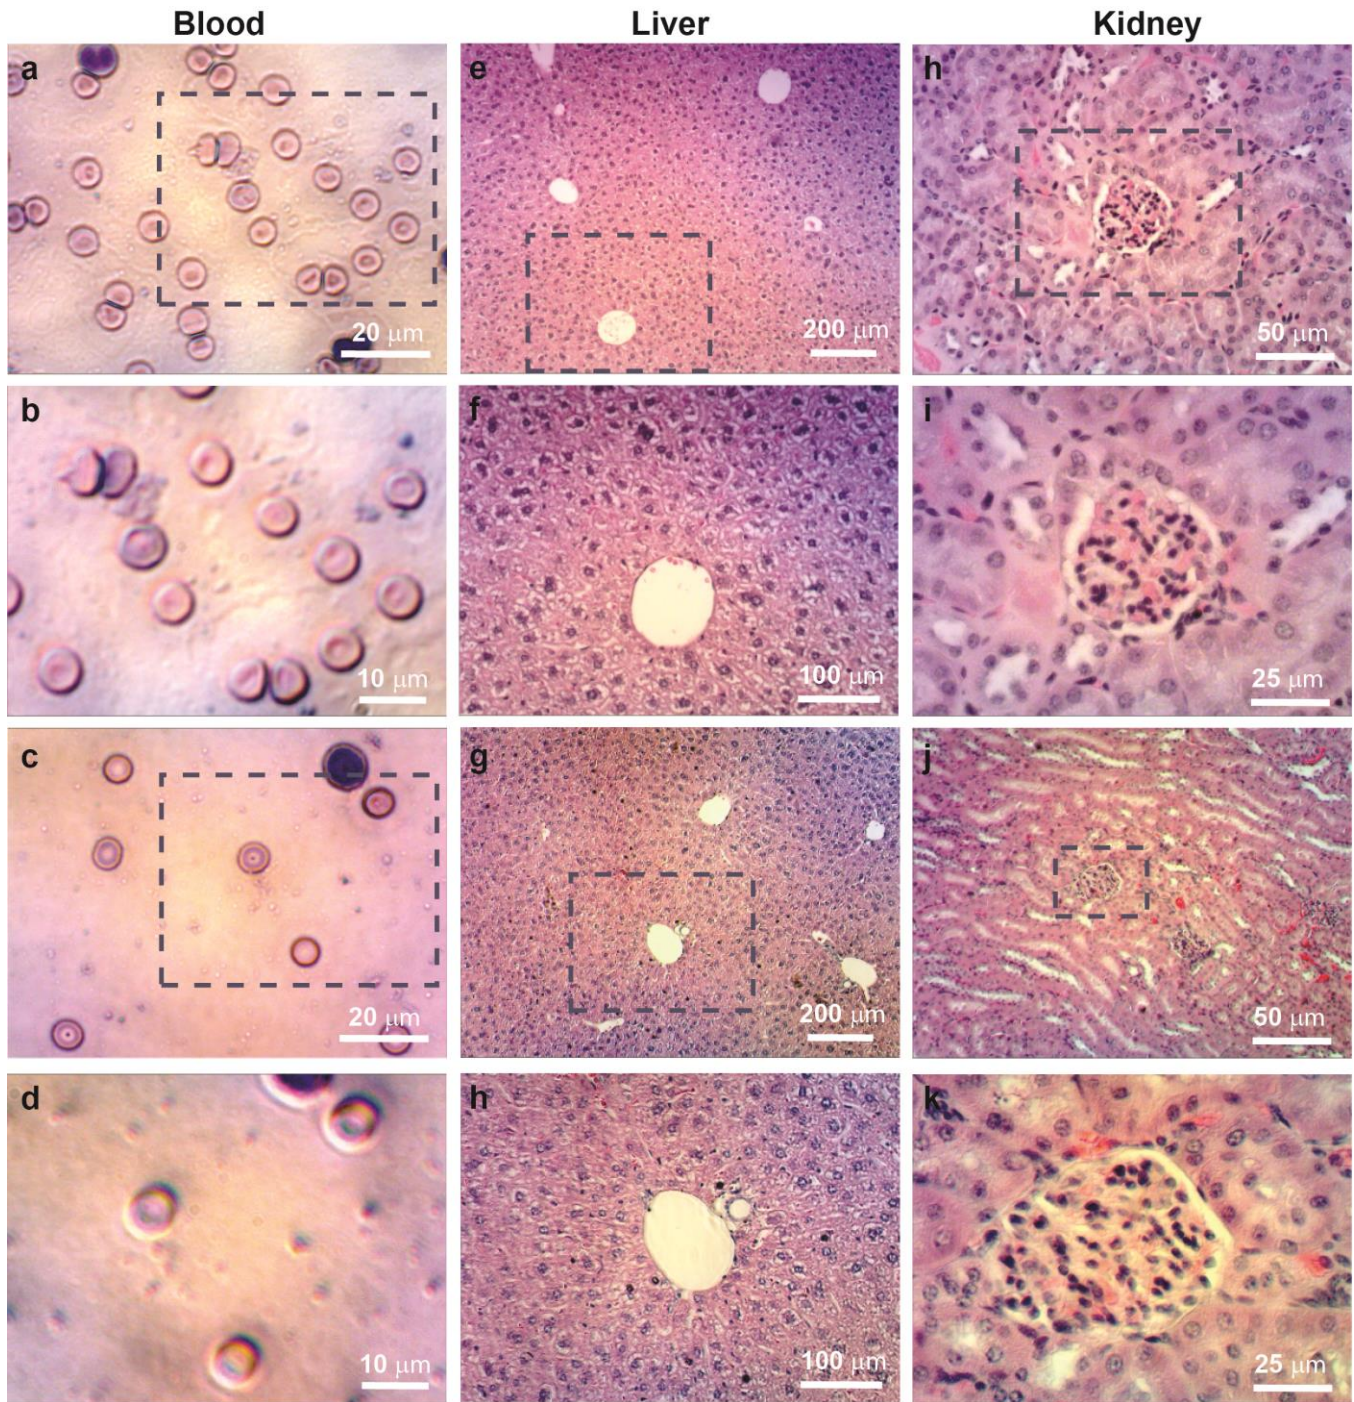

**Supplementary Figure 8**

Histology of murine tissues after IV treatment with Mag(i+4)1,15(A9K)

Peripheral blood smears (a-d) and H&E stained sections of liver (e-h) and kidney (h-k) from n=8 mice (4 male, 4 female) treated with Mag(i+4)15(A9K) (5 mg/kg IV BID x 8 d). Each vertical pair (a-b, c-d, e-f, g-h, h-i, j-k) represents a low and higher power view (enlargement of boxed image) of the indicated tissue. For each tissue, specimens from two different mice are shown. RBC morphology and liver histology are normal. Whereas some of the treated mice showed predominantly normal kidney histology (h-k), others manifested regions of mild-to-moderate tubular degeneration, as shown in Fig. 4j and Supplementary Fig. 12b.

Mag(i+4)1,15(A9K,B21A, N22K, S23K)

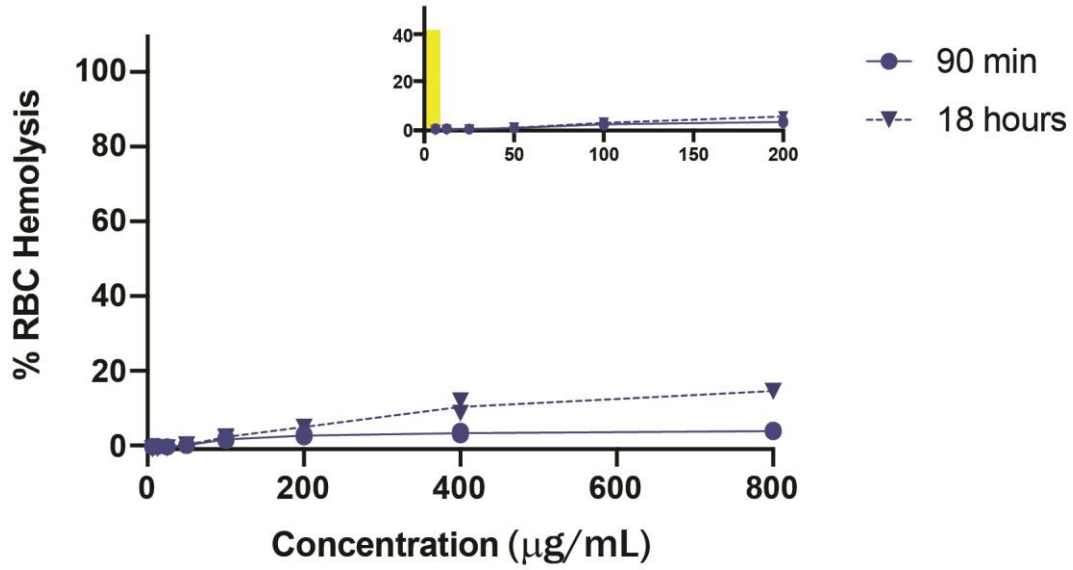

Supplementary Figure 9

RBC response to Mag(i+4)15(A9K,B21A,N22K,S23K) treatment

Mag(i+4)15(A9K,B21A,N22K,S23K) shows little to no RBC hemolytic activity across a broad dose-effective range, and even when dosed as high as 800 µg/mL for 90 minutes or 18 hours. The data from two independently performed experiments are shown as dots, with several pairs of replicate data points overlapping. The Gram-negative bactericidal dosing range is highlighted in yellow in the inset.

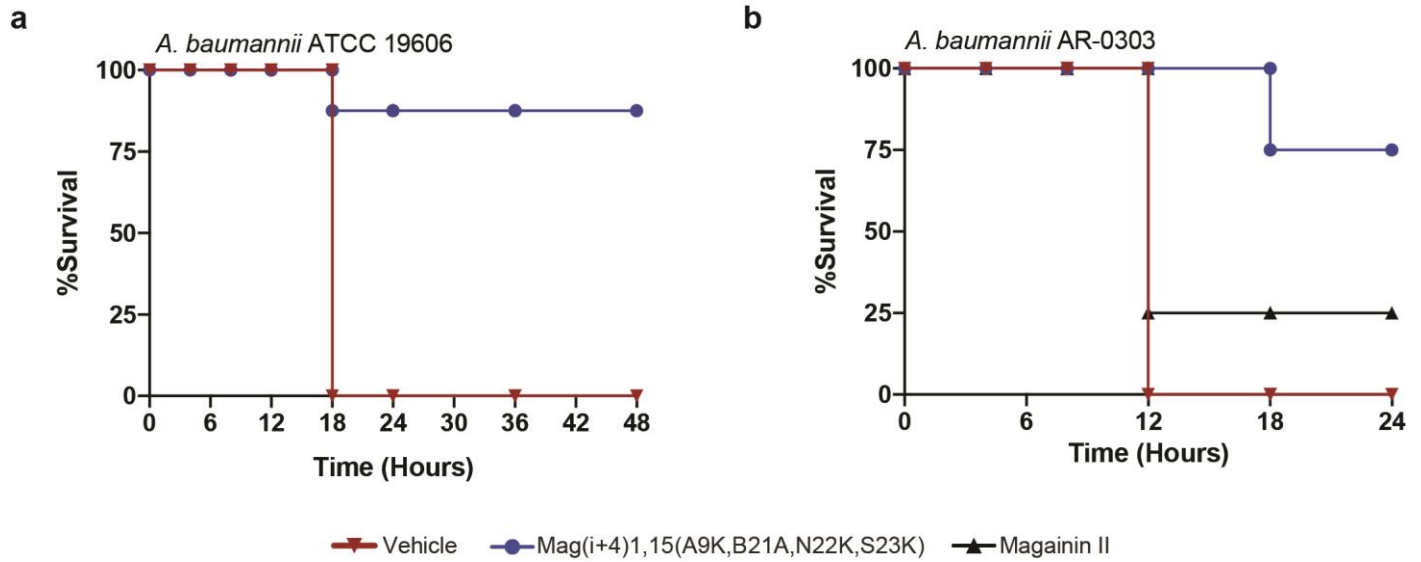

### Supplementary Figure 10

Comparative activity of linear and stapled Mag2 peptides in a peritonitis-sepsis mouse model

**a**, Kaplan Meier survival curves of neutropenic mice (n=8 per arm) infected with *A. baumannii* (ATCC 19606) intraperitoneally and treated with either vehicle (saline) or two 5 mg/kg IP doses of Mag(i+4)15(A9K,B21A,N22K,S23K). p=0.0006 for StAMP vs. vehicle by log rank test (two-sided). **b**, Kaplan Meier survival curves of neutropenic mice (n=8 per arm) infected with *A. baumannii* (AR-0303) intraperitoneally and treated with either vehicle (saline) or two 5 mg/kg IP doses of Mag2 or Mag(i+4)15(A9K,B21A,N22K,S23K). p=0.0001 for StAMP vs. Vehicle; p=0.02 for StAMP vs. Mag2; and p=0.1432 (n.s.) for Mag2 vs. Vehicle, as calculated by log rank test (two-sided).

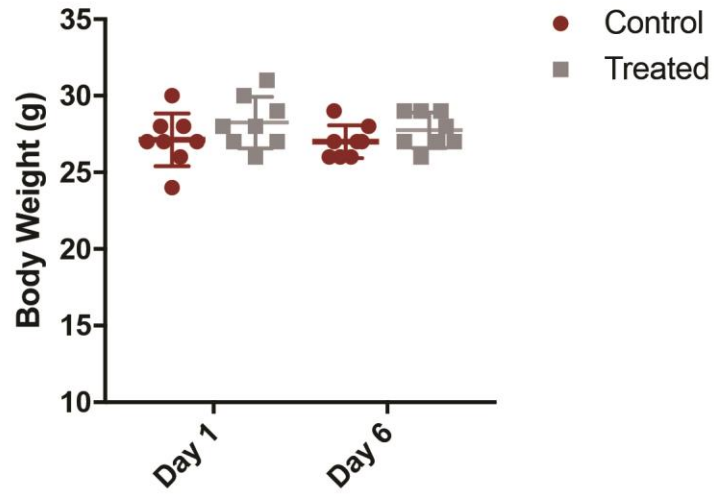

### Supplementary Figure 11

Body weights of StAMP-treated mice

Mice were treated with vehicle or Mag(i+4)15(A9K,B21A,N22K,S23K) at an intravenous dose of 5 mg/kg twice daily for 5 days. Body weights were measured before (day 1) and after 5 days of treatment (day 6). Data are mean  $\pm$  s.d. for n=8 female mice per arm.

**a**

Mag(i+4)1,15(A9K,B21A,N22K,S23K)

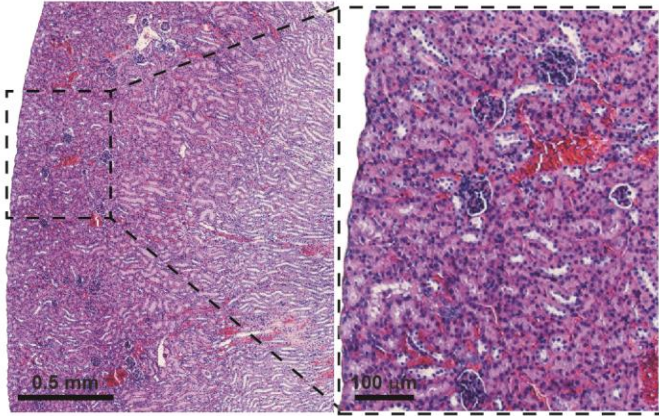

**b**

Mag(i+4)1,15(A9K)

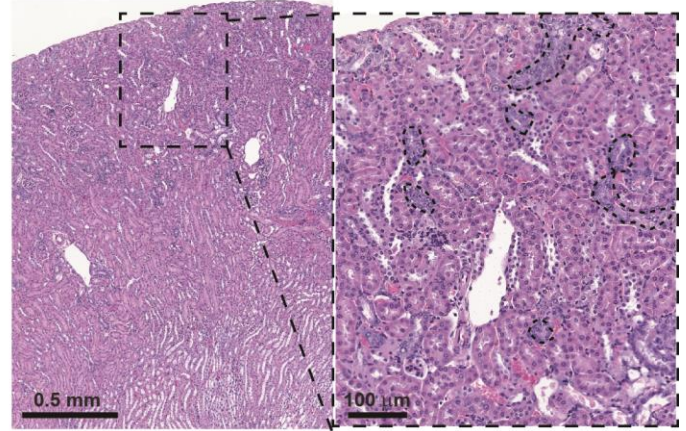

### Supplementary Figure 12

Histology of murine kidney after intravenous treatment with StAMPs

**a-b**, Mice (n=8 per arm) were treated with vehicle, Mag(i+4)15(A9K,B21A,N22K,S23K), or Mag(i+4)15(A9K) at an intravenous dose of 5 mg/kg twice daily for 5 days. H&E stained sections of kidney tissue from mice treated with Mag(i+4)15(A9K,B21A,N22K,S23K) showed normal histology (**a**), whereas select mice treated with Mag(i+4)15(A9K) manifested mild-to-moderate renal tubule degeneration (**b**) (affected regions outlined in dashed black lines). For each image pair, the boxed tissue on the left is enlarged in the image to the right.

| Peptide    | Total Hydrophobicity | % $\alpha$ -Helicity | C18 Column HPLC Retention Time (min) | pI    | 3D Hydrophobic Moment Magnitude | 3D Hydrophobic Moment Angle |
|------------|----------------------|----------------------|--------------------------------------|-------|---------------------------------|-----------------------------|
| Mag(i+4)0  | 0.443                | 15                   | 12.093                               | 11.16 | 13.297                          | 104.145                     |
| Mag(i+4)1  | 0.369                | 12                   | 12.154                               | 11.28 | 14.153                          | 102.544                     |
| Mag(i+4)2  | 0.516                | 21                   | 13.537                               | 11.28 | 12.687                          | 99.6603                     |
| Mag(i+4)3  | 0.566                | 18                   | 14.198                               | 10.99 | 7.762                           | 121.614                     |
| Mag(i+4)4  | 0.430                | 24                   | 13.402                               | 11.16 | 14.028                          | 103.384                     |
| Mag(i+4)5  | 0.490                | 14                   | 15.684                               | 10.99 | 12.253                          | 91.951                      |
| Mag(i+4)6  | 0.559                | 18                   | 13.672                               | 10.99 | 10.861                          | 97.766                      |
| Mag(i+4)7  | 0.445                | 26                   | 14.021                               | 11.16 | 13.359                          | 104.697                     |
| Mag(i+4)8  | 0.508                | 49                   | 16.127                               | 11.16 | 14.275                          | 103.744                     |
| Mag(i+4)9  | 0.607                | 28                   | 18.986                               | 10.73 | 11.545                          | 78.655                      |
| Mag(i+4)10 | 0.551                | 15                   | 13.320                               | 10.99 | 11.350                          | 100.438                     |
| Mag(i+4)11 | 0.366                | 16                   | 12.907                               | 11.16 | 14.435                          | 102.540                     |
| Mag(i+4)12 | 0.468                | 51                   | 15.271                               | 11.16 | 14.754                          | 101.222                     |
| Mag(i+4)13 | 0.564                | 23                   | 13.596                               | 10.99 | 14.184                          | 87.685                      |
| Mag(i+4)14 | 0.536                | 19                   | 13.188                               | 14.00 | 16.177                          | 103.941                     |
| Mag(i+4)15 | 0.365                | 15                   | 12.133                               | 11.16 | 14.682                          | 102.505                     |
| Mag(i+4)16 | 0.415                | 11                   | 12.333                               | 11.16 | 14.922                          | 101.059                     |
| Mag(i+4)17 | 0.547                | 30                   | 12.726                               | 11.16 | 17.185                          | 95.744                      |
| Mag(i+4)18 | 0.551                | 19                   | 13.135                               | 14.00 | 18.917                          | 103.915                     |

**Supplementary Table 1 Measured and calculated biophysical parameters for a staple-scanning Mag(i+4) library.**

| Strain | Microorganism        | Drug Sensitivity |        |     |       |      |      |      |         | Mag(i+4)1,15(A9K)<br>MIC (µg/ml)* |
|--------|----------------------|------------------|--------|-----|-------|------|------|------|---------|-----------------------------------|
|        |                      | Amp              | Ceftaz | CTX | Cipro | Doxy | Gent | Mero | TMP/SMX |                                   |
| RB001  | <i>E. coli</i>       | S                | S      | S   | S     | I    | S    | S    | S       | 1.56                              |
| RB002  | <i>E. coli</i>       | R                | R      | R   | R     | R    | -    | -    | I       | 1.56                              |
| RB019  | <i>P. aeruginosa</i> | -                | S      | -   | S     | -    | -    | S    | -       | 3.12                              |
| RB020  | <i>P. aeruginosa</i> | -                | R      | -   | I     | -    | -    | -    | -       | 1.56                              |
| RB040  | <i>K. pneumoniae</i> | -                | S      | -   | S     | -    | S    | -    | -       | 6.25                              |
| RB013  | <i>K. pneumoniae</i> | -                | R      | -   | R     | -    | I    | -    | -       | 3.12                              |
| RB197  | <i>A. baumannii</i>  | -                | -      | -   | S     | -    | S    | S    | S       | 1.56                              |
| RB206  | <i>A. baumannii</i>  | -                | -      | -   | R     | -    | R    | R    | R       | 1.56                              |

S=Susceptible, I=Intermediate, R=Resistant; Amp=Ampicillin, Ceftaz=Ceftazidime, CTX=Ceftriaxone  
Cipro=Ciprofloxacin, Doxy=Doxycycline, Gent=Gentamicin, Mero=Meropenem, TMP/SMX=Trimethoprim/  
sulfamethoxazole. \*Geometric mean.

**Supplementary Table 2 Activity of Mag(i+4)1,15(A9K) against drug-resistant Gram-negative clinical isolates from the Massachusetts General Hospital.**

| Peptide                              | Sequence                          | MW   | (MW+3)/3 | Figures/Tables                 |
|--------------------------------------|-----------------------------------|------|----------|--------------------------------|
| Magainin II                          | GIGKFLHSAKKFGKAFVGEIMNS           | 2466 | 823      | 1,2,4,5,S1, S10b               |
| Mag(i+4)0                            | XIGKXLHSAKKFGKAFVGEIBNS           | 2493 | 832      | 1,2,S2,S3,S4, Table S1         |
| Mag(i+4)1                            | GXGKFXHSAKKFGKAFVGEIBNS           | 2471 | 825      | 1,2,S2,S3,S4, Table S1         |
| Mag(i+4)2                            | GIKKFLXSAKKFGKAFVGEIBNS           | 2503 | 835      | 1,2,3,S2,S3,S4, Table S1       |
| Mag(i+4)3                            | GIGXFLHXAKKFGKAFVGEIBNS           | 2482 | 828      | 1,2,S2,S3,S4, Table S1         |
| Mag(i+4)4                            | GIGKXLHSXKKFGKAFVGEIBNS           | 2479 | 827      | 1,2,S2,S3,S4, Table S1         |
| Mag(i+4)5                            | GIGKFXHSAKXFGKAFVGEIBNS           | 2456 | 820      | 1,2,S2,S3,S4, Table S1         |
| Mag(i+4)6                            | GIGKFLXSAKXFGKAFVGEIBNS           | 2432 | 812      | 1,2,S2,S3,S4, Table S1         |
| Mag(i+4)7                            | GIGKFLHXAKKXGKAFVGEIBNS           | 2463 | 822      | 1,2,3,S2,S3,S4, Table S1       |
| Mag(i+4)8                            | GIGKFLHSXKKFXKAFVGEIBNS           | 2569 | 857      | 1,2,3,S2,S3,S4, Table S1       |
| Mag(i+4)9                            | GIGKFLHSAXKFGXAFVGEIBNS           | 2441 | 815      | 1,2,S2,S3,S4, Table S1         |
| Mag(i+4)10                           | GIGKFLHSAXFGKXVGEIBNS             | 2498 | 834      | 1,2,S2,S3,S4, Table S1         |
| Mag(i+4)11                           | GIGKFLHSAKKXGKAXVGEIBNS           | 2403 | 802      | 1,2,S2,S3,S4, Table S1         |
| Mag(i+4)12                           | GIGKFLHSAKKFXKAFXGEIBNS           | 2541 | 848      | 1,2,S2,S3,S4, Table S1         |
| Mag(i+4)13                           | GIGKFLHSAKKFGXAFVXEIBNS           | 2512 | 838      | 1,2,S2,S3,S4, Table S1         |
| Mag(i+4)14                           | GIGKFLHSAKKFGKXVFXIBNS            | 2497 | 833      | 1,2,3,S2,S3,S4, Table S1       |
| Mag(i+4)15                           | GIGKFLHSAKKFGKAXVGEIBNS           | 2437 | 813      | 1,2,S2,S3,S4, Table S1         |
| Mag(i+4)16                           | GIGKFLHSAKKFGKAFXGEIXNS           | 2485 | 829      | 1,2,3,S2,S3,S4, Table S1       |
| Mag(i+4)17                           | GIGKFLHSAKKFGKAFXEIBXS            | 2526 | 843      | 1,2,S2,S3,S4, Table S1         |
| Mag(i+4)18                           | GIGKFLHSAKKFGKAFVXIBNX            | 2481 | 828      | 1,2,3,S2,S3,S4, Table S1       |
| Mag(i+4)15(G1K)                      | KIGKFLHSAKKFGKAXVGEIBNS           | 2508 | 837      | 2,S5                           |
| Mag(i+4)15(I2K)                      | GKIGKFLHSAKKFGKAXVGEIBNS          | 2452 | 818      | 2,S5                           |
| Mag(i+4)15(G3K)                      | GIKKFLHSAKKFGKAXVGEIBNS           | 2508 | 837      | 2,S5                           |
| Mag(i+4)15(F5K)                      | GIGKFLHSAKKFGKAXVGEIBNS           | 2418 | 807      | 2,S5                           |
| Mag(i+4)15(L6K)                      | GIGKFLHSAKKFGKAXVGEIBNS           | 2452 | 818      | 2,S5                           |
| Mag(i+4)15(H7K)                      | GIGKFLHSAKKFGKAXVGEIBNS           | 2428 | 810      | 2,S5                           |
| Mag(i+4)15(S8K)                      | GIGKFLHSAKKFGKAXVGEIBNS           | 2478 | 827      | 2,S5                           |
| Mag(i+4)15(A9K)                      | GIGKFLHSAKKFGKAXVGEIBNS           | 2494 | 832      | 2,S5                           |
| Mag(i+4)15(F12K)                     | GIGKFLHSAKKFGKAXVGEIBNS           | 2418 | 807      | 2,S5                           |
| Mag(i+4)15(G13K)                     | GIGKFLHSAKKFGKAXVGEIBNS           | 2508 | 837      | 2,S5                           |
| Mag(i+4)15(A15K)                     | GIGKFLHSAKKFGKAXVGEIBNS           | 2494 | 832      | 2,S5                           |
| Mag(i+4)15(V17K)                     | GIGKFLHSAKKFGKAXVGEIBNS           | 2466 | 823      | 2,S5                           |
| Mag(i+4)15(G18K)                     | GIGKFLHSAKKFGKAXVGEIBNS           | 2508 | 837      | 2,S5                           |
| Mag(i+4)15(E19K)                     | GIGKFLHSAKKFGKAXVGEIBNS           | 2436 | 813      | 2,S5                           |
| Mag(i+4)15(B21K)                     | GIGKFLHSAKKFGKAXVGEIBNS           | 2452 | 818      | 2,S5                           |
| Mag(i+4)15(N22K)                     | GIGKFLHSAKKFGKAXVGEIBNS           | 2451 | 818      | 2,S5                           |
| Mag(i+4)15(S23K)                     | GIGKFLHSAKKFGKAXVGEIBNS           | 2478 | 827      | 2,S5                           |
| Mag(i+4)1,15(A9K)                    | GXGKFXHSKKKFGKAXVGEIBNS           | 2518 | 840      | 4, 5,S5,S6,S7,S8,S12, Table S2 |
| Mag(i+7)1                            | G8GKFLHSXKKFGKAFVGEIBNS           | 2555 | 853      | S1                             |
| Mag(i+7)2                            | GI8KFLHSAKXFGKAFVGEIBNS           | 2554 | 852      | S1                             |
| Mag(i+7)3                            | GIG8FLHSAKXFGKAFVGEIBNS           | 2483 | 829      | S1                             |
| Mag(i+7)4                            | GIGK8LHSAKXGKAFVGEIBNS            | 2445 | 816      | S1                             |
| Mag(i+7)5                            | GIGKFX8HSAKXGKAFVGEIBNS           | 2569 | 857      | S1                             |
| Mag(i+7)6                            | GIGKFL8SAKXGKAFVGEIBNS            | 2474 | 826      | S1                             |
| Mag(i+7)7                            | GIGKFLH8AKKFGKXVGEIBNS            | 2581 | 861      | S1                             |
| Mag(i+7)8                            | GIGKFLHS8KKFGKAXVGEIBNS           | 2521 | 841      | S1                             |
| Mag(i+7)9                            | GIGKFLHSA8KFGKAFXGEIBNS           | 2512 | 838      | S1                             |
| Mag(i+7)10                           | GIGKFLHSAK8FGKAFXEIBNS            | 2554 | 852      | S1                             |
| Mag(i+7)11                           | GIGKFLHSAK8GKAFVGEIBNS            | 2463 | 822      | S1                             |
| Mag(i+7)12                           | GIGKFLHSAK8KAFVGEIBNS             | 2569 | 857      | S1                             |
| Mag(i+7)13                           | GIGKFLHSAK8GKAFVGEIXNS            | 2498 | 834      | S1                             |
| Mag(i+7)14                           | GIGKFLHSAK8FGVGEIBXS              | 2554 | 852      | S1                             |
| Mag(i+4)1,15 (K4R, A9K)              | GXGRFXHSKKKFGKAXVGEIBNS           | 2546 | 850      | 5                              |
| Mag(i+4)1,15 (K4R, A9K, K10R)        | GXGRFXHSKRKFGKAXVGEIBNS           | 2574 | 859      | 5                              |
| Mag(i+4)1,15 (K4H, A9K)              | GXGHFXHSKKKFGKAXVGEIBNS           | 2527 | 843      | 5                              |
| Mag(i+4)1,15 (K4H, A9K, K10H)        | GXGHFXHSKHKFGKAXVGEIBNS           | 2536 | 846      | 5                              |
| Mag(i+4)1,15 (K4H, A9K, K10H, K11H)  | GXGHFXHSKHHFGKAXVGEIBNS           | 2545 | 849      | 5                              |
| Mag(i+4)1,15 (A9K, B21A)             | GXGKFXHSKKKFGKAXVGEIXNS           | 2476 | 826      | 5                              |
| Mag(i+4)1,15 (A9K, B21A, N22K, S23K) | GXGKFXHSKKKFGKAXVGEIXAKK          | 2531 | 845      | 5, 6,S9,S10,S11,S12            |
| Pleurocidin                          | GWGSFFKKAHVGGKAVGKALATHYL         | 2709 | 904      | 6                              |
| Pleu(i+4)12                          | GWGSFFKKAHVXKHHVXKALATHYL         | 2845 | 949      | 6                              |
| Pleu(i+4)1,15                        | GXGSFXKKAHVGGKXGKAXLATHYL         | 2706 | 903      | 6                              |
| Pleu(i+4)1,15(A9K)                   | GXGSFXKKAHVGGKXGKAXLATHYL         | 2763 | 922      | 6                              |
| CAP(i+4)1,23(L17K)                   | GXRKRXRKFRNKIKEKIKKIKGQKXQGLXPKLA | 3862 | 1288     | 6                              |
| Esc(i+4)1,14(A7K)                    | GXFSSXKGGKIKNLXISGXKG             | 2289 | 764      | 6                              |

X, S5 stapling amino acid; 8, R8 stapling amino acid; B, norleucine; peptide N-termini are NH<sub>2</sub>, and C-termini are CONH<sub>2</sub> for stapled peptides and COOH for Mag2.

### Supplementary Table 3 Stapled peptide compositions and experimental applications.



## End-User License Agreement

NOTICE TO USER: PLEASE READ THIS NON-EXCLUSIVE SOFTWARE LICENSE AGREEMENT (“THIS AGREEMENT”) CAREFULLY. BY DOWNLOADING AND/OR USING ALL OR ANY PORTION OF THE SOFTWARE YOU INDICATE YOUR ACCEPTANCE OF THE FOLLOWING TERMS FROM INSTITUTE. YOU AGREE TO BE BOUND BY ALL TERMS AND CONDITIONS OF THIS AGREEMENT. YOU AGREE THAT THIS AGREEMENT IS ENFORCEABLE AS IF IT WERE AN INDIVIDUALLY- NEGOTIATED AGREEMENT SIGNED BY YOU.

This Agreement is between Dana-Farber Cancer Institute, Inc., a Massachusetts nonprofit corporation and 501(c)(3) tax-exempt organization, (the “Institute”) and you (the “Licensee”) (a natural person).

### 1. Definitions

- 1.1 “Purpose” means the use of the Software for academic and educational purposes.
- 1.2 “Use” or “Using” means to access, use, run, download, or otherwise benefit from accessing the Software.

### 2. Grant of License

- 2.1 The Licensee wishes to acquire a license to Use the Software for the Purpose and the Institute hereby grants to Licensee a non-exclusive, non-transferable, non-sublicensable, non-assignable license to Institute’s rights to Use the Software for the Purpose.
- 2.2 Licensee must accept all of the terms and conditions of this Agreement by checking “I Agree.” Once Licensee has accepted this Agreement, the Licensee will enter a valid e-mail address and password (the “Login”) to the Software. The Login will give the Licensee access to the Software for the Purpose.

### 3. Ownership and Use of Software

- 3.1 The Licensee agrees that the Software will not be transferred to anyone else by the Licensee without the prior written consent of Institute. The Software is provided “as is”. Licensee acknowledges and agrees that the Software has not been approved for any use by any regulatory authority.
- 3.2 As between the Institute and Licensee, the Institute has and will retain sole and exclusive ownership of all right, title and interest in and to the Software, including all copyright and any other intellectual property rights therein. This Agreement grants a limited license to Use the Software for the Purpose and does not and will not be construed to convey title to or ownership of the Software to Licensee. All rights in and to the Software not expressly granted to Licensee by this Agreement are reserved by the Institute. The Software is protected by copyright, trademark, and/or other intellectual property rights and laws. Any unauthorized Use of the Software, including but not limited to any Use other than for the Purpose, may violate such laws and this Agreement. Permission to reprint or otherwise reproduce any document in whole or in part is prohibited. Except as provided in this Agreement, no express or implied licenses or other rights are provided to the Licensee under any patents, patent applications, trade secrets, or other proprietary rights of Institute.
- 3.3 Licensee is solely responsible for all data and information collected, collated, and processed using the Software and Licensee is solely responsible for compliance with all and any statutory obligations relating thereto.
- 3.4 The Licensee will Use the Software only for the Purpose and for no other purposes, including any commercial purposes. Licensee will not modify, adapt, disassemble, reverse engineer, decompile, translate, or otherwise attempt to modify the Software or the source code of the Software, or write or develop any derivative software or any other software program based on or that makes use of the Software or permit any third party to modify, adapt, disassemble, reverse engineer, decompile, translate or otherwise attempt to modify the Software or the source code of the Software, or write or develop any derivative software or any other software program based on or that makes use of the Software.
- 3.5 The Licensee will not distribute, transfer, sub-license, assign, sell, lend, provide any services to third parties, provide access (including without limitation via a public-access internet site) to all or any part of the Software or use the Software or any portion thereof to process the work of any third party.

- 3.6 If the Licensee desires to Use or license the Software for commercial purposes, the Licensee agrees, in advance of such use, to negotiate in good faith with Institute to establish the terms of a commercial license. It is understood by the Licensee that Institute has no obligation to grant such a license to the Licensee and may grant exclusive or non-exclusive commercial or noncommercial licenses to others, or sell or assign all or part of the rights in the Software to any third party(ies), subject to any pre-existing rights held by others and obligations to the United States federal Government.

#### **4. Disclaimer and Limitation of Liability**

- 4.1 THE SOFTWARE IS PROVIDED ON AN "AS IS" BASIS, AND INSTITUTE, ITS ADMINISTRATORS, TRUSTEES, DIRECTORS, OFFICERS, EMPLOYEES, AGENTS, AND INSURERS MAKE NO REPRESENTATIONS OR WARRANTIES, EXPRESS OR IMPLIED, WITH RESPECT THERETO. BY WAY OF EXAMPLE, BUT NOT OF LIMITATION, INSTITUTE, ITS ADMINISTRATORS, TRUSTEES, DIRECTORS, OFFICERS, EMPLOYEES, AGENTS, AND INSURERS MAKE NO REPRESENTATIONS OR WARRANTIES: (i) OF COMMERCIAL UTILITY; (ii) OF MERCHANTABILITY OR FITNESS FOR A PARTICULAR PURPOSE; (iii) AS TO THE VALIDITY OF ANY INTELLECTUAL PROPERTY RIGHTS; (iv) THAT THE USE OF THE SOFTWARE WILL NOT INFRINGE ANY PATENT, COPYRIGHT, TRADE SECRET, TRADEMARK, OR OTHER PROPRIETARY RIGHTS OF OTHERS; (v) AS TO THE ABSENCE OF LATENT OR OTHER DEFECTS, WHETHER OR NOT DISCOVERABLE (vi) AS TO THE SOFTWARE'S ACCURACY, TIMELINESS, OR COMPLETENESS. INSTITUTE, ITS ADMINISTRATORS, TRUSTEES, DIRECTORS, OFFICERS, EMPLOYEES, AGENTS, AND INSURERS WILL NOT BE LIABLE TO LICENSEE, LICENSEE'S SUCCESSORS OR ASSIGNS, OR ANY THIRD PARTY (IF SUCH THIRD PARTY'S CLAIM RESULTS FROM LICENSEE'S OR ANY OF ITS AFFILIATES' OR AGENTS' ACTIVITIES) WITH RESPECT TO: (i) ANY CLAIM ARISING FROM USE BY LICENSEE OR ANY AFFILIATE THEREOF OF THE SOFTWARE; OR (ii) ANY CLAIM FOR LOSS OF PROFITS, LOSS OR INTERRUPTION OF BUSINESS, OR FOR INCIDENTAL, INDIRECT, SPECIAL, OR CONSEQUENTIAL DAMAGES OF ANY KIND, INCLUDING, WITHOUT LIMITATION, ECONOMIC DAMAGE, INJURY TO PROPERTY, AND/OR LOST PROFITS, REGARDLESS OF WHETHER INSTITUTE SHALL BE ADVISED, SHALL HAVE REASON TO KNOW, OR IN FACT SHALL KNOW OF THE POSSIBILITY OF SUCH DAMAGES OR INJURY.
- 4.2 Licensee will defend, indemnify, and hold harmless Institute, its administrators, trustees, officers, directors, employees, agents, and insurers (individually, an "Indemnified Party," and collectively, the "Indemnified Parties"), at the expense of Licensee, from and against any and all liability, loss, injury, damage, action, court or administrative order, claim, or expense suffered or incurred by the Indemnified Parties, including, without limitation, reasonable attorney's fees and expenses, court costs and other legal expenses, (individually, a "Liability," and collectively, the "Liabilities") that results from or arises out of: (a) any act or failure to act of Licensee or any of its affiliates; (b) the Use of the Software by Licensee, or any of its affiliates or any of its agents or any other third parties under Licensee's control; (c) any material breach by Licensee or any of its affiliates of this Agreement; or (d) the enforcement by an Indemnified Party of this Section, in each case, other than as a result of Liabilities resulting from or related to the gross negligence or willful misconduct of one or more Indemnified Parties. Licensee will not settle or compromise any claim or action giving rise to Liabilities in a manner that imposes any restrictions or obligations on any Indemnified Party or grants any rights to the Software without Institute's prior written consent. If Licensee fails or declines to assume the defense of any such claim or action within thirty (30) days after notice thereof, Institute may assume the defense of such claim or action for the account and at the risk of Licensee, and any Liabilities related thereto will be conclusively deemed a liability of Licensee. The indemnification rights of Institute and other Indemnified Parties contained herein are in addition to all other rights which such Indemnified Party may have at law or in equity or otherwise.

#### **5. Privacy Policy**

- 5.1 Upon Licensee's checking "I Agree," Licensee's information will be collected and will be held securely in accordance with all applicable laws, regulations and Institute's privacy policy, which can be accessed

at <https://www.dana-farber.org/privacy-policy/>. Such information will be used to enable the Institute to provide Licensee access to the Software and the Login for the Purpose and not for any other purposes.

## 6. General

- 6.1 This Agreement constitutes the entire agreement and understanding of the parties and supersedes all negotiations, understandings or previous agreement between the parties relating to the subject matter of this Agreement. This Agreement may not be changed, modified, or extended except by written amendment executed by an authorized representative of each party.
- 6.2 This Agreement will be construed and governed in accordance with the laws of the Commonwealth of Massachusetts, without giving effect to conflict of law provisions applicable therein. In the event that a party to this Agreement perceives the existence of a dispute with the other party concerning any right or duty provided for herein, the parties will confer as soon as practicable in an attempt to resolve the dispute. If the parties are unable to resolve such dispute amicably, then the parties hereby submit to the exclusive jurisdiction of and venue in the federal and state courts located in the Commonwealth of Massachusetts with respect to any and all disputes concerning the subject of this Agreement.
- 6.3 Licensee will not use Institute's name, any adaptation thereof, any Institute seal, logotype, trademark, or service mark, or the name, mark, or logotype of any Institute employee, representative, or organization in any way without the prior written consent of Institute.
- 6.4 A waiver by either party of a breach of any provision of this Agreement will not constitute a waiver of any subsequent breach of that provision or a waiver of any breach of any other provision of this Agreement.
- 6.5 Licensee will comply with all prevailing laws, rules, and regulations that apply to its activities and/or obligations under this Agreement. Without limiting the foregoing, it is understood that this Agreement may be subject to United States laws and regulations controlling the export of technical data, computer software, laboratory prototypes and other commodities, articles and information, including the Arms Export Control Act as amended in the Export Administration Act of 1979, and that the parties' obligations are contingent upon compliance with applicable United States export laws and regulations. The transfer of certain technical data and commodities may require a license from the appropriate agency of the United States Government and/or written assurances by Licensee that Licensee will not export data or commodities to certain foreign countries without prior approval of such agency. Institute represents neither that a license is not required nor that, if required, it will issue.
- 6.6 If any provision of this Agreement is held to be illegal, invalid, or unenforceable, then such illegality, invalidity, or unenforceability will attach only to such provision and will not in any manner affect or render illegal, invalid, or unenforceable any other provision of this Agreement. This Agreement will be carried out as if any such illegal, invalid or unenforceable provision were not contained herein.
- 6.7 Notices and other communications under this Agreement will be in writing and will be deemed to have been received as of the date sent if sent by public courier (e.g., Federal Express) or by Express Mail, receipt requested, and addressed as follows:

**If for Institute:** Belfer Office for Dana-Farber Innovations  
Dana-Farber Cancer Institute, Inc.  
450 Brookline Avenue  
Boston, MA 02215  
Attn: Vice-President, Dana-Farber Innovations

**If to Licensee:** To the e-mail address provided in the Login.

Either party may change its official address upon written notice to the other party.
